# Supplementary material for: Selective luminescent sensing of metal ions and nitroaromatics over a porous mixed-linker cadmium(ii) based metal–organic framework
Source: Royal Society of Chemistry journal article supplement (doi:10.1039/d1nj04025a), 2022-01-01
Supplement: d1nj04025a1.pdf [file d1nj04025a1.pdf]

## *Electronic Supporting Information*

### **Selective luminescent sensing of metal ions and nitro-aromatics over a porous mixed-linker cadmium(II) based metal-organic framework**

Rakesh Debnath,<sup>a</sup> Rahul Bhowmick,<sup>a</sup> Pameli Ghosh,<sup>a</sup> Saptarshi Biswas<sup>b</sup> and Subratanath Koner\*.<sup>a</sup>

**Table S1.** Bond distances (Å) and angles (°) around the metal centre in Cd-MOF1

| <b>Atoms</b>                                                                                       | <b>Distance</b> | <b>Atoms</b>                            | <b>Distance</b> |
|----------------------------------------------------------------------------------------------------|-----------------|-----------------------------------------|-----------------|
| Cd1 - O1                                                                                           | 2.241(5)        | Cd1 - O4 <sup>a</sup>                   | 2.437(6)        |
| Cd1 - O3 <sup>a</sup>                                                                              | 2.325(6)        | Cd1 - N3                                | 2.368(6)        |
| Cd1 - O2 <sup>b</sup>                                                                              | 2.324(6)        |                                         |                 |
| <b>Atoms</b>                                                                                       | <b>Angle</b>    | <b>Atoms</b>                            | <b>Angle</b>    |
| O1 - Cd1 - N3                                                                                      | 90.57(10)       | O2 <sup>b</sup> - Cd1 - N3              | 86.68(11)       |
| O1 - Cd1 - O3 <sup>a</sup>                                                                         | 142.72(18)      | N3 - Cd1 - N3 <sup>c</sup>              | 172.32(15)      |
| O1 - Cd1 - O4 <sup>a</sup>                                                                         | 88.27(18)       | O3 <sup>a</sup> - Cd1 - O4 <sup>a</sup> | 54.45(16)       |
| O1 - Cd1 - O2 <sup>b</sup>                                                                         | 128.73(18)      | O2 <sup>b</sup> - Cd2 - O3 <sup>a</sup> | 88.56(15)       |
| O3 <sup>a</sup> - Cd1 - N3                                                                         | 91.85(10)       | O2 <sup>b</sup> - Cd2 - O4 <sup>a</sup> | 143.01(15)      |
| O4 <sup>a</sup> - Cd1 - N3                                                                         | 93.82(11)       |                                         |                 |
| Symmetry element <sup>a</sup> = 1-x,-1/2+y,3/2-z; <sup>b</sup> = x,1-y,1-z; <sup>c</sup> = 1-x,y,z |                 |                                         |                 |

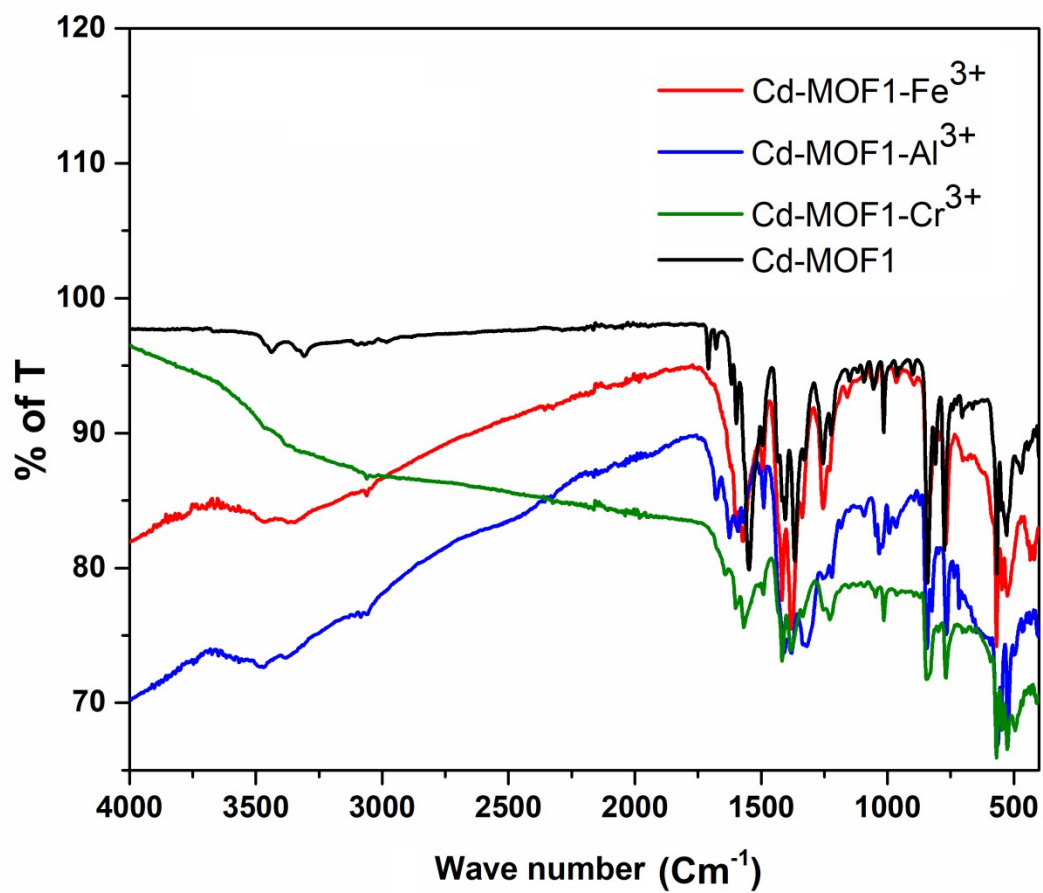

**Fig. S1** IR spectra of Cd-MOF1 and Cd-MOF1 treated with various metal salt solutions

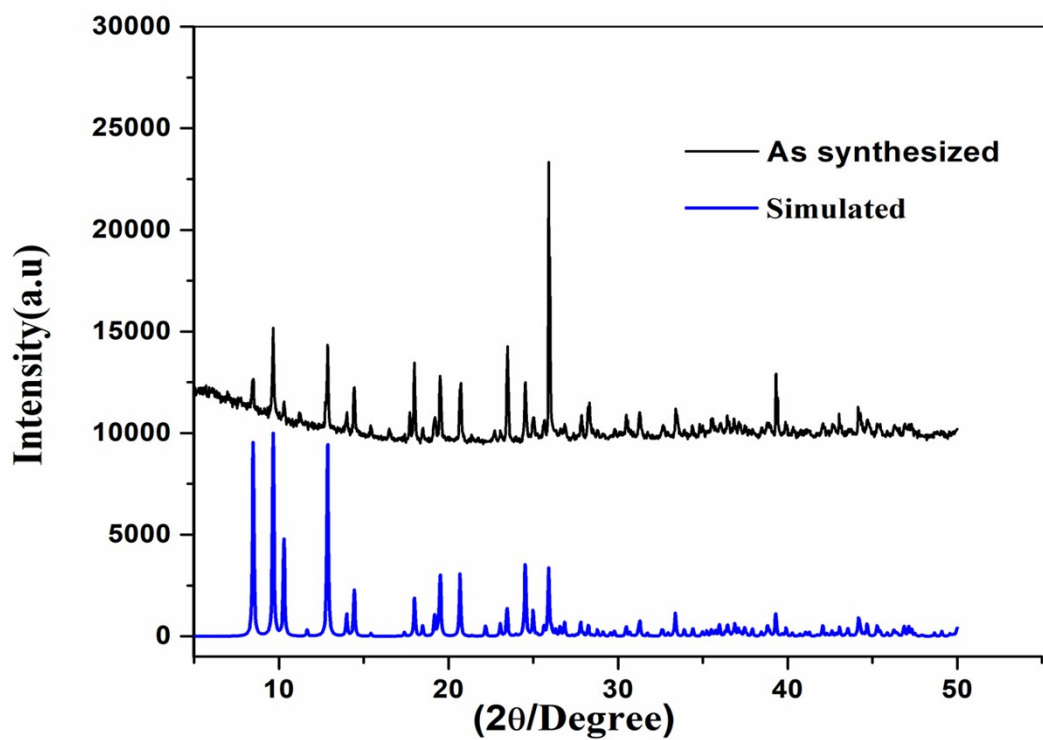

**Fig. S2** Powder X-ray diffraction pattern of Cd-MOF1 simulate (blue) and as synthesise (black).

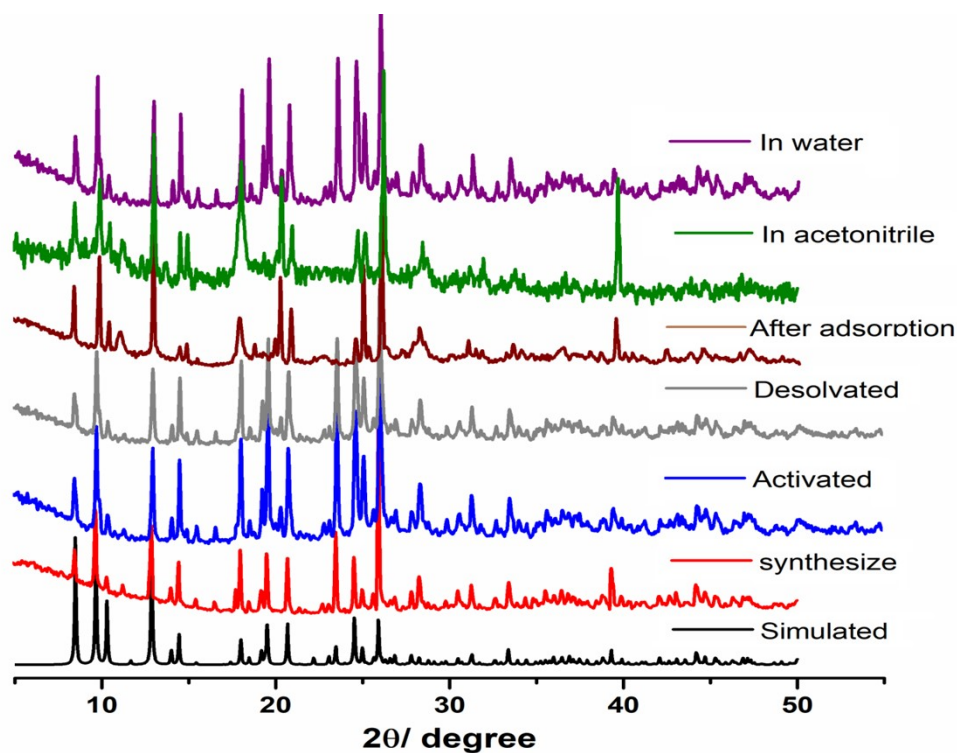

**Fig. S3a** Powder X-ray diffraction pattern of Cd-MOF1 at different conditions

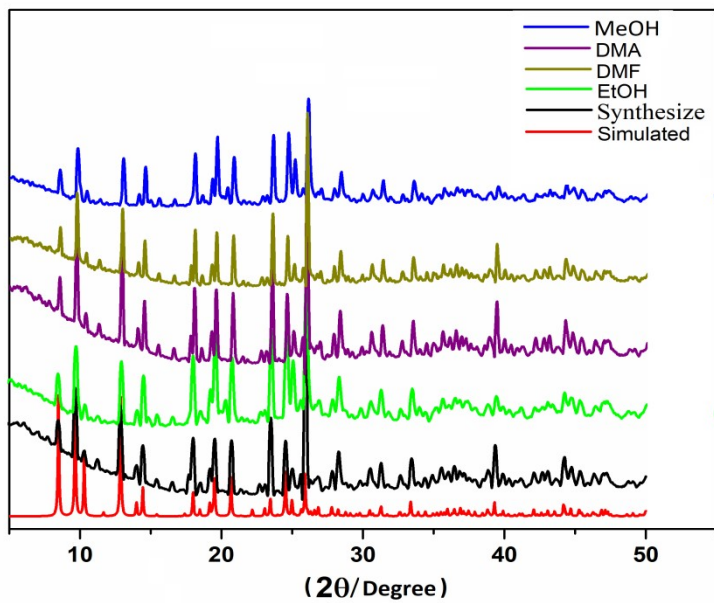

Fig. S3b Powder X-ray diffraction pattern of Cd-MOF1 after immersing in various solvents

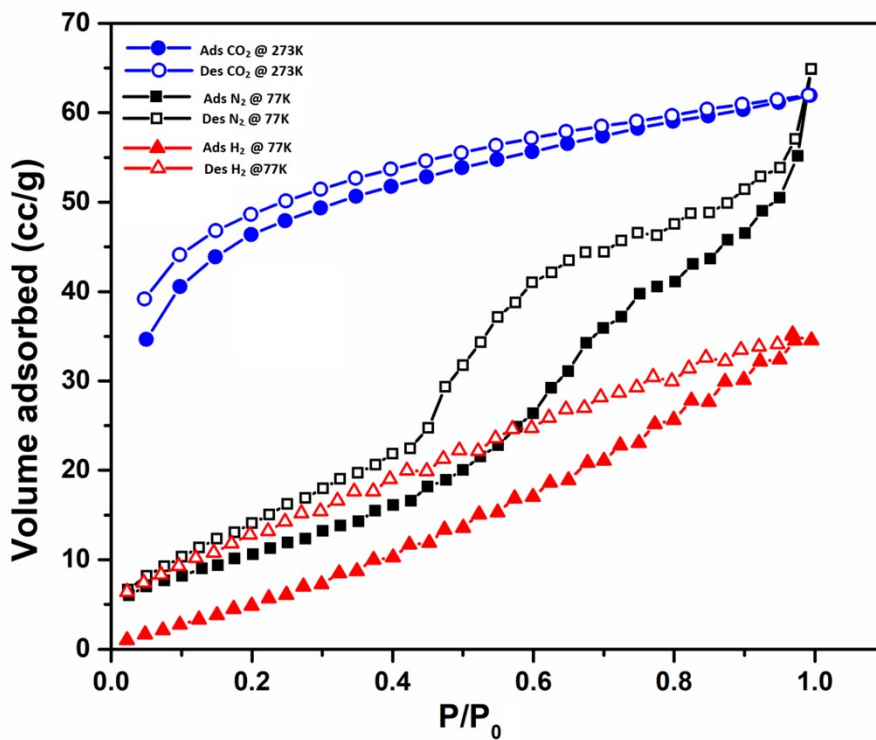

**Fig. S4a** Gas adsorption isotherms of N<sub>2</sub> (black), H<sub>2</sub> (red) measured at 77K and CO<sub>2</sub> (blue) measured at 273K

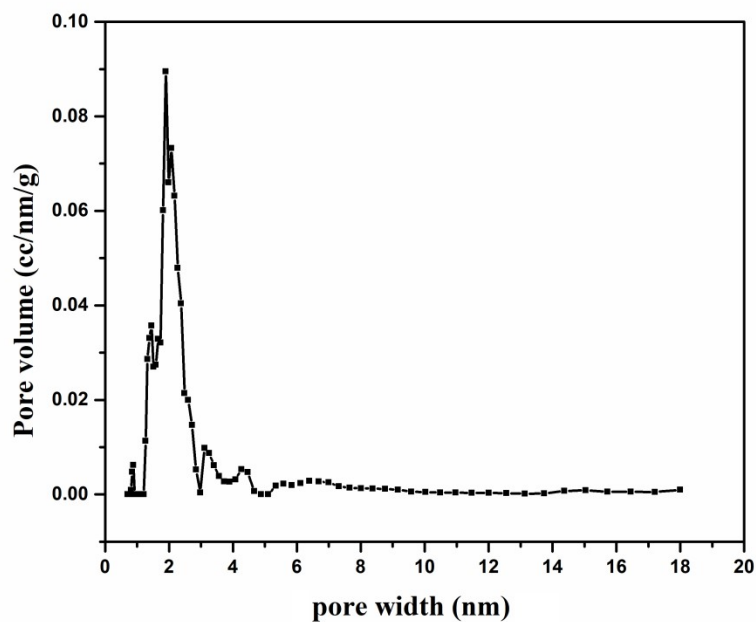

**Fig. S4b** Pore size distribution plot of Cd-MOF1 calculated using NLDFIT method

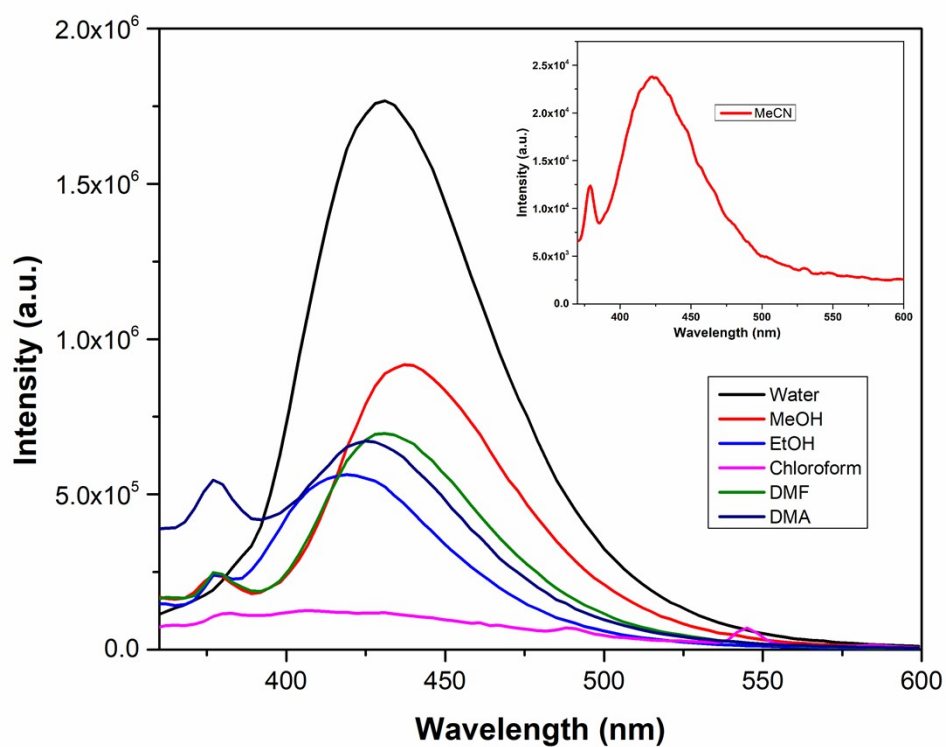

**Fig. S5a** Comparison of fluorescence spectra of Cd-MOF1 dispersed in various solvent media ( $\lambda_{\text{ex}} = 370$  nm). Fluorescence response of Cd-MOF1 dispersed in MeCN (inset) is weaker than other solvents.

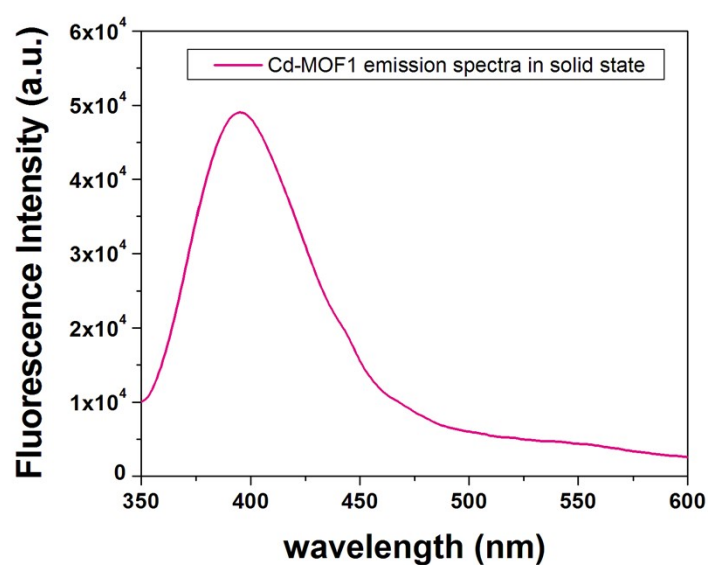

**Fig. S5b** Solid state emission spectrum of Cd-MOF1 ( $\lambda_{\text{ex}} = 340$  nm).

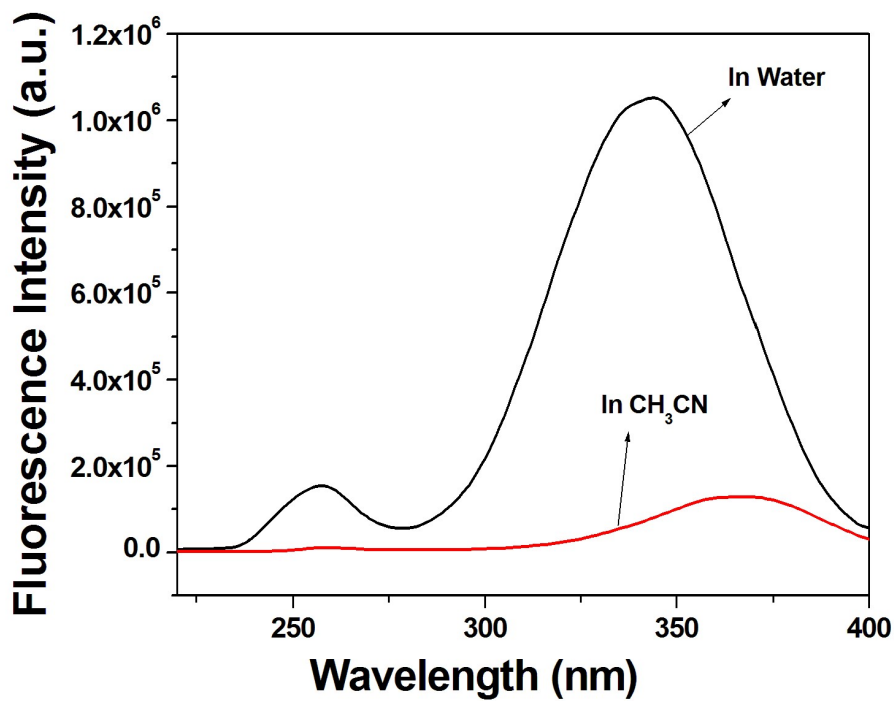

Fig. S5c Comparison of excitation spectrum of Cd-MOF1 (10  $\mu$ M) at  $\lambda_{em} = 428$  nm in acetonitrile and water media.

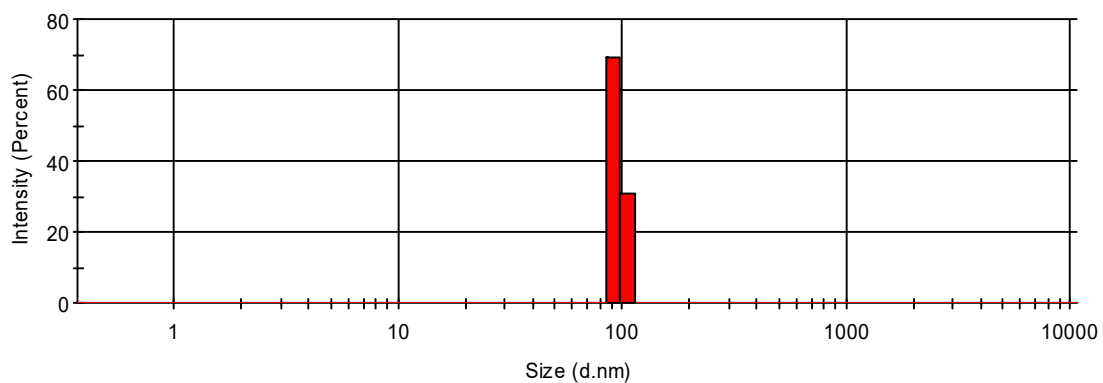

**Fig. 6a** Dynamic light scattering plot showing particle size distribution of Cd-MOF1 (2  $\mu\text{M}$ ) in water medium

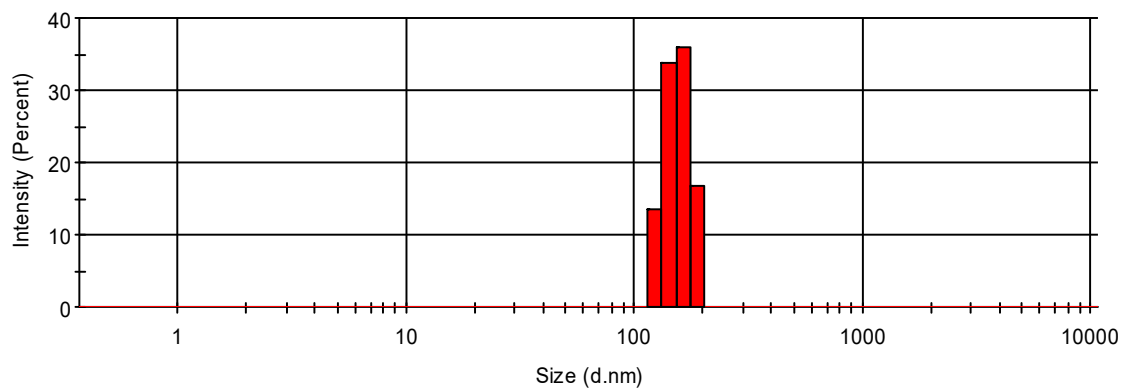

**Fig. 6b** Dynamic light scattering plot showing particle size distribution of Cd-MOF1 (2  $\mu\text{M}$ ) in presence of TNP (2 $\mu\text{M}$ ) in water medium

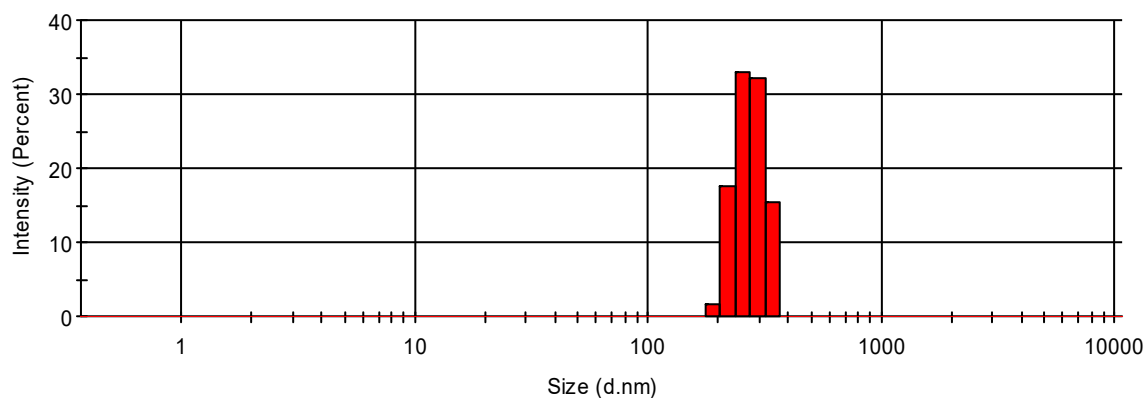

**Fig 6c** Dynamic light scattering plot showing particle size distribution of Cd-MOF1 (5  $\mu\text{M}$ ) in presence of TNP (5 $\mu\text{M}$ ) in water medium



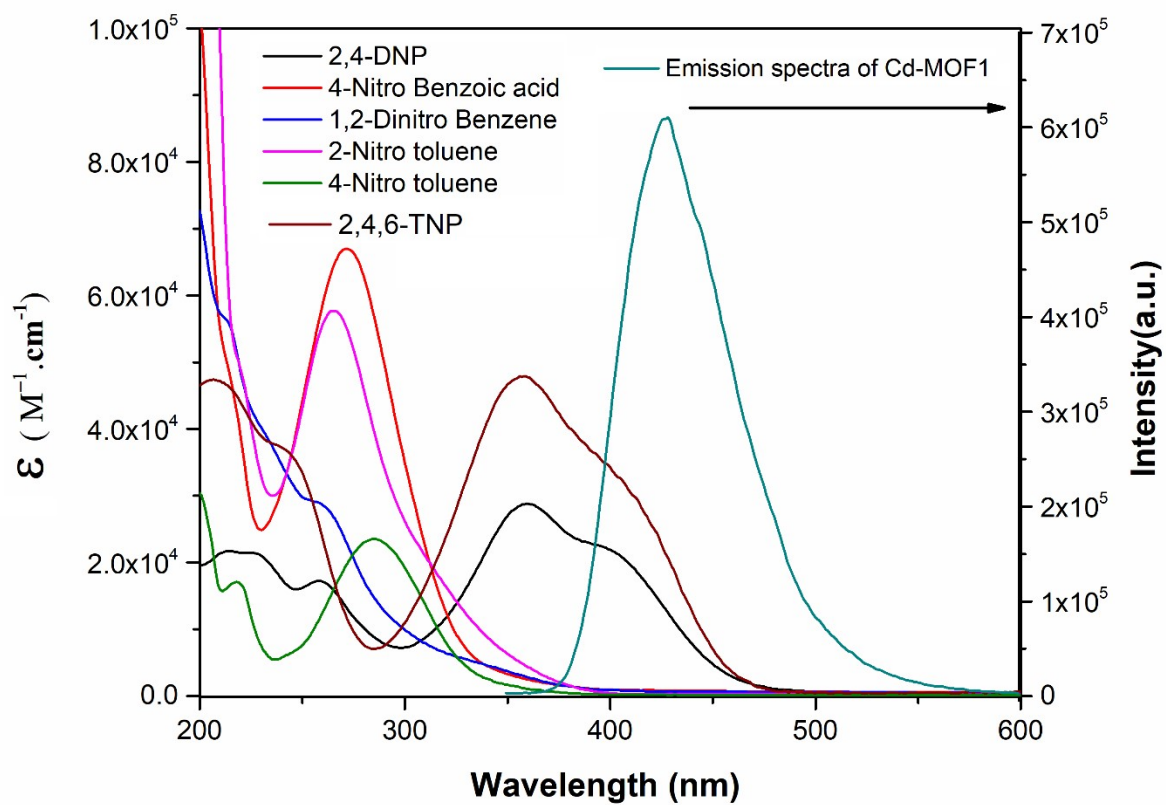

**Fig. S7** Plot showing the extent of spectral overlap between absorption band of nitroaromatics and emission band of the Cd-MOF1

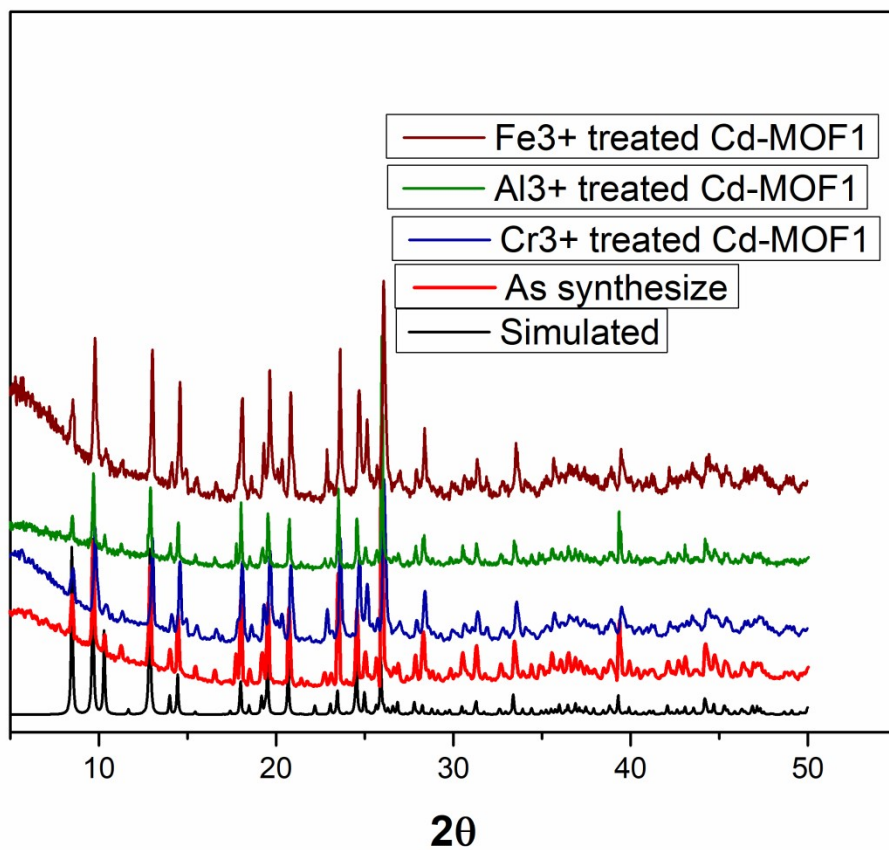

**Fig. S8** Powder X-ray diffraction patterns of Cd-MOF1 and solid recovered after metal ion ( $\text{Fe}^{3+}$ ,  $\text{Al}^{3+}$  and  $\text{Cr}^{3+}$ ) sensing experiment

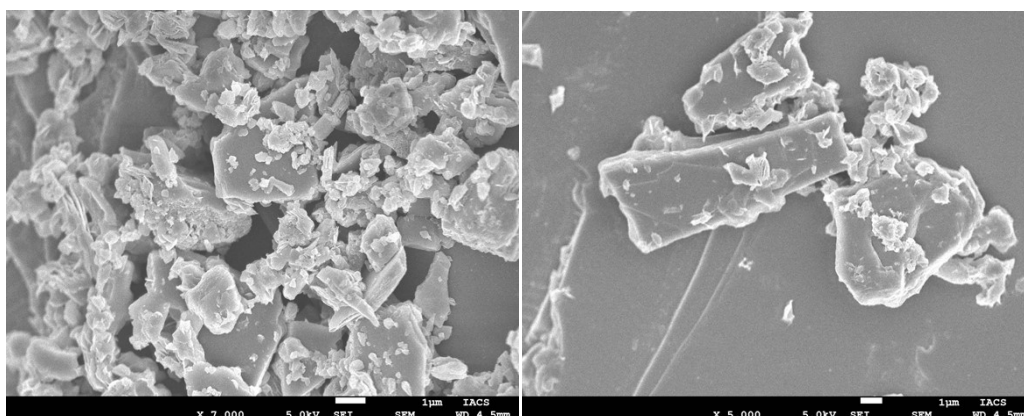

(A)

(B)

**Fig. S9a** FE-SEM images of pure Cd-MOF1 (A) and metal treated Cd-MOF1 (B)

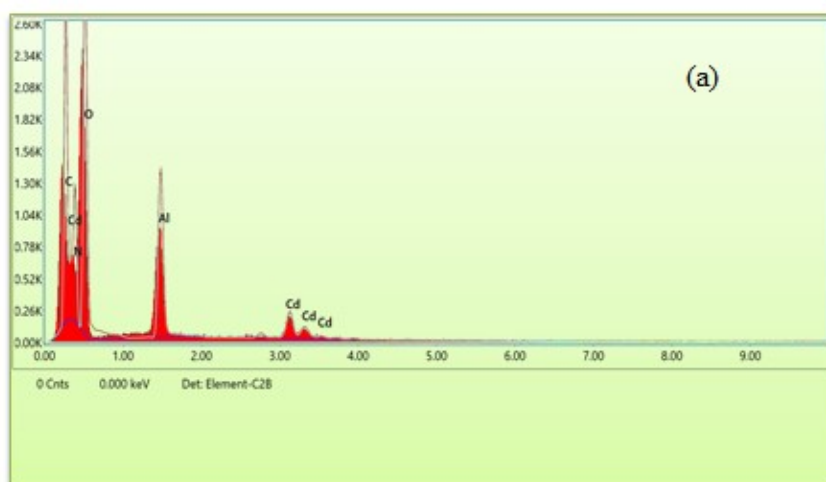

| Element | Weight % |
|---------|----------|
| C K     | 25.49    |
| N K     | 16.89    |
| O K     | 43.01    |
| AlK     | 8.69     |
| CdL     | 5.92     |

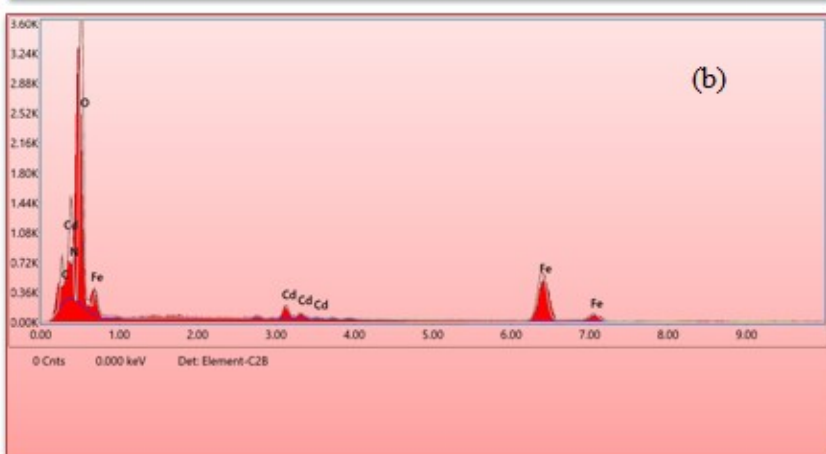

| Element | Weight % |
|---------|----------|
| C K     | 7.16     |
| N K     | 11.15    |
| O K     | 39.99    |
| CdL     | 4.68     |
| FeK     | 37.02    |

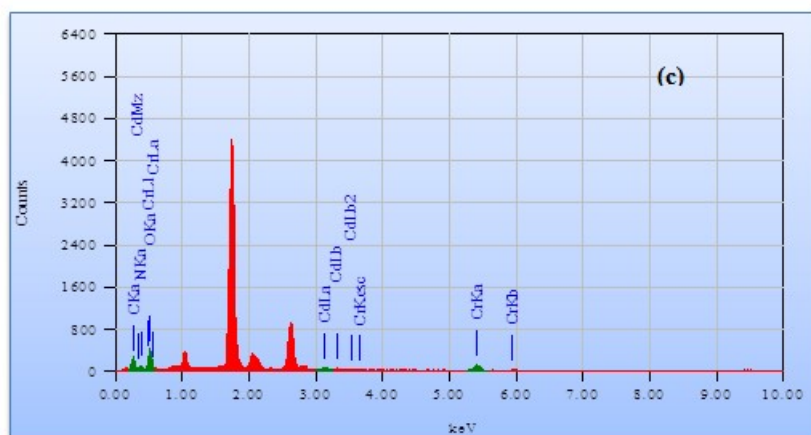

| Element | Weight % |
|---------|----------|
| C K     | 12.3528  |
| N K     | 13.0594  |
| O K     | 29.3898  |
| CdL     | 14.3553  |
| CrK     | 30.8427  |

**Fig. S9b** EDS analysis of (a) Al<sup>3+</sup> treated Cd-MOF1; (b) Fe<sup>3+</sup> treated Cd-MOF1; (c) Cr<sup>3+</sup> treated Cd-MOF1.

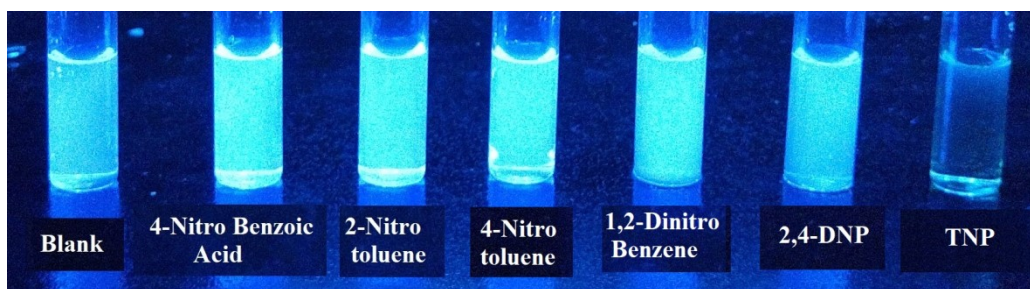

**Fig. S10a** Visual change of fluorescence intensity of Cd-MOF1 (in water) addition of nitro-explosives under UV light

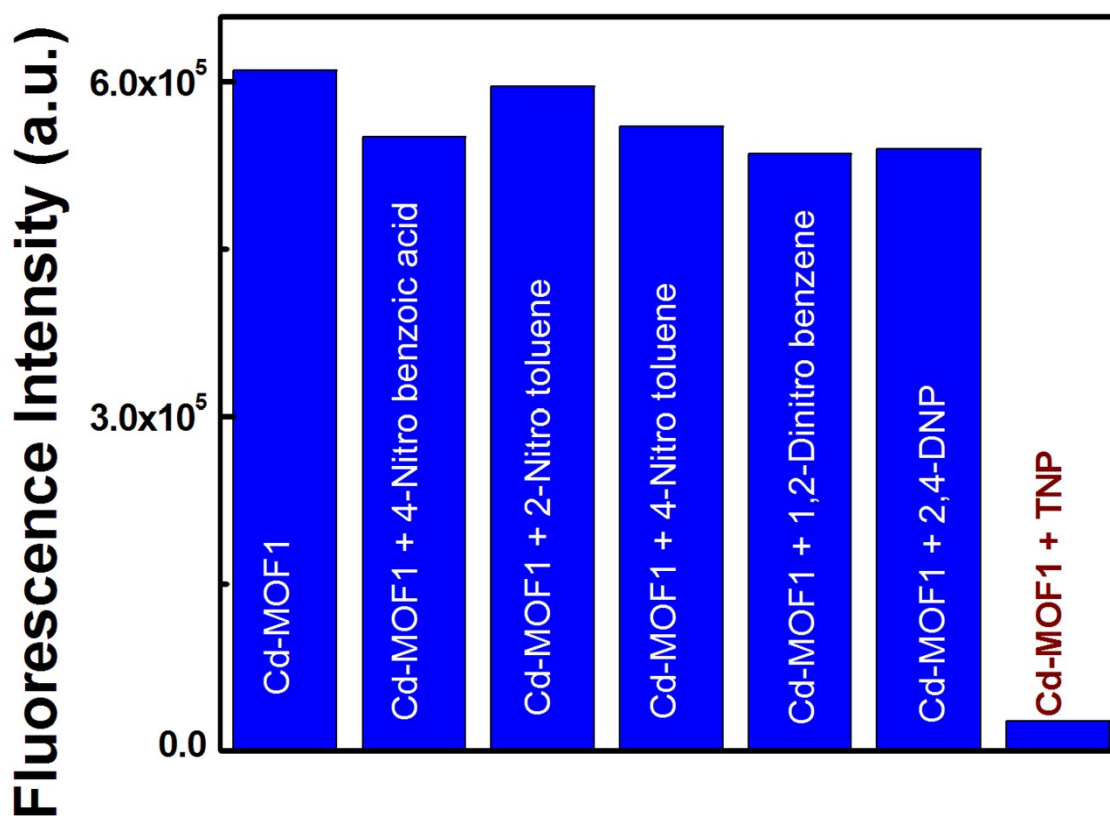

**Fig. S10b** Bar chart showing fluorescence response of Cd-MOF1 towards different nitroaromatics
